# Supplementary material for: A Study on How Using an Interactive Multimedia E-Book Improves Teachers’ Ability to Teach Evidence-Based Medicine, Depending on Their Seniority
Source: Research Square preprint supplement (doi:10.21203/rs.3.rs-156325/v1), 2021-02-05
Supplement: Supplementary file 1 [file eb8faa4128f866fa2d1675b9.docx]

**A study on how using an interactive multimedia e-book improves teachers’ ability to teach evidence-based medicine, depending on their seniority**

Yu-Hsuan Liao1**,** Kuo-Shu Tang1, Chih-Jen Chen1, Ying-Hsien Huang1, and, Mao-Meng Tiao1,2,3,*

1Department of Pediatrics, Kaohsiung Chang Gung Memorial Hospital and Chang Gung University College of Medicine, Kaohsiung, Taiwan; 2 Chang Gung Medical Education Research Center, CGMERC, No. 5, Fusing St., Gueishan Township, Taoyuan City, Taiwan; 3 Department of Clinical Education, Flinders University, Australia.

Supplementary file. The PowerPoint for the control group.
