# Supplementary material for: A Study on How Using an Interactive Multimedia E-Book Improves Teachers’ Ability to Teach Evidence-Based Medicine, Depending on Their Seniority
Source: Research Square preprint supplement (doi:10.21203/rs.3.rs-156325/v1), 2021-02-05
Supplement: Supplementary file [file 6bc39503270e9f0a5675612a.pdf]

# 實 證 醫 學

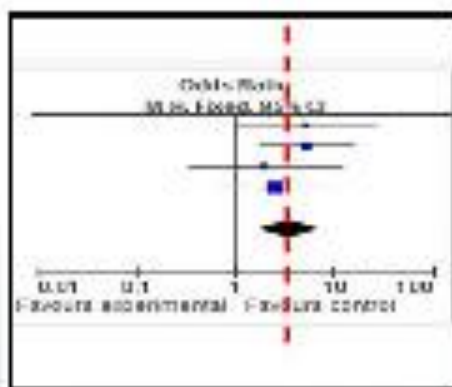

刁茂盟製作

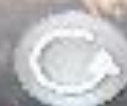

高雄長庚紀念醫院  
Chang Gung Memorial Hospital, Kaohsiung

## 目錄

- |                      |           |
|----------------------|-----------|
| 1. EBM definition    | 6. test 1 |
| 2. EBM 5 steps       | 7. test 2 |
| 3. Searching skills  | 8. test 3 |
| 4. RCT               | 9. test 4 |
| 5. Systematic review |           |

# Evidence-based medicine (EBM) : defintion

1. the conscientious, explicit and judicious
2. use of current best evidence in making decisions
3. about the care of individual patients
  - Conscientious: **careful** to do everything
  - explicit : express **clearly** and directly
  - Judicious: **wise**: done sensibly and carefully

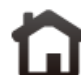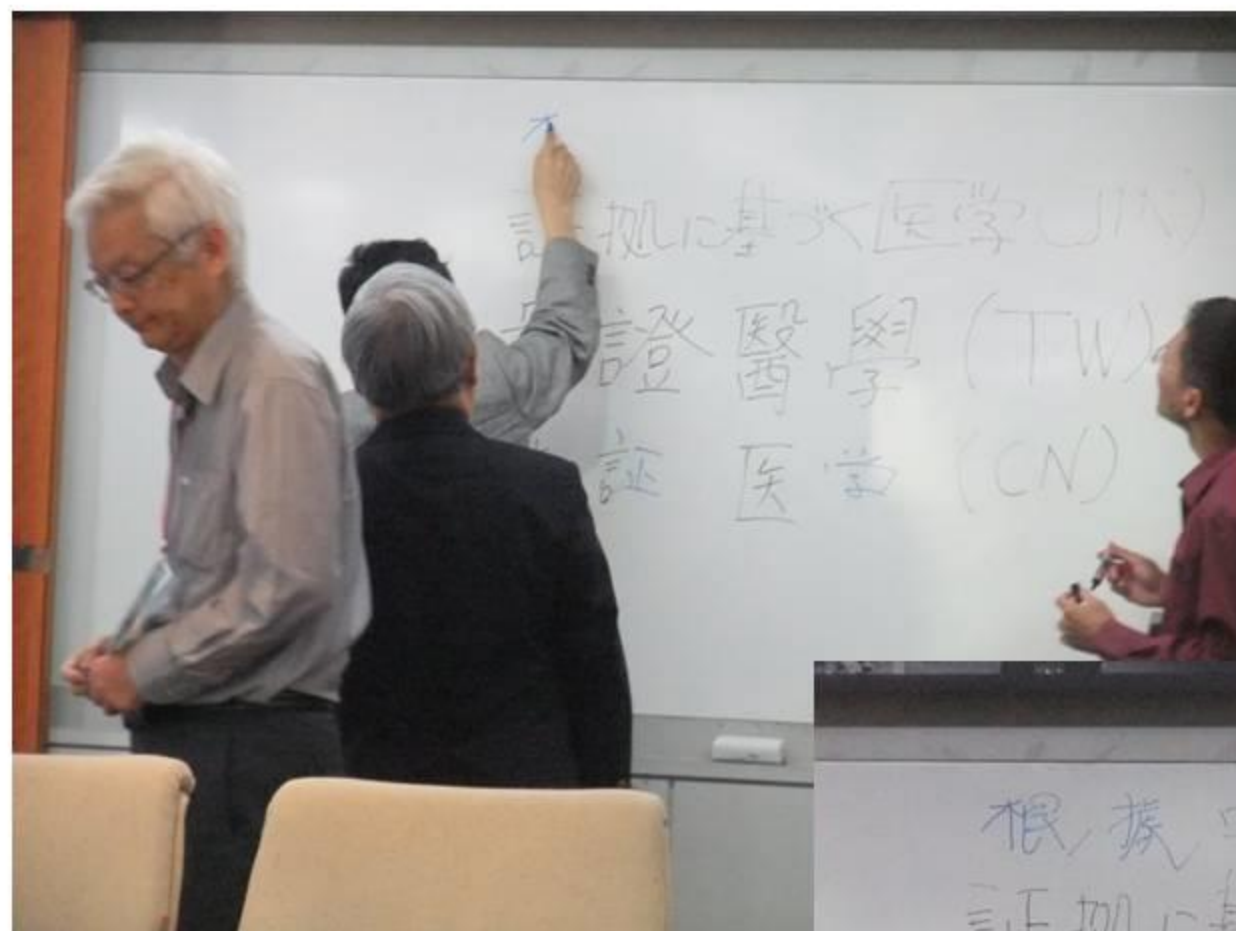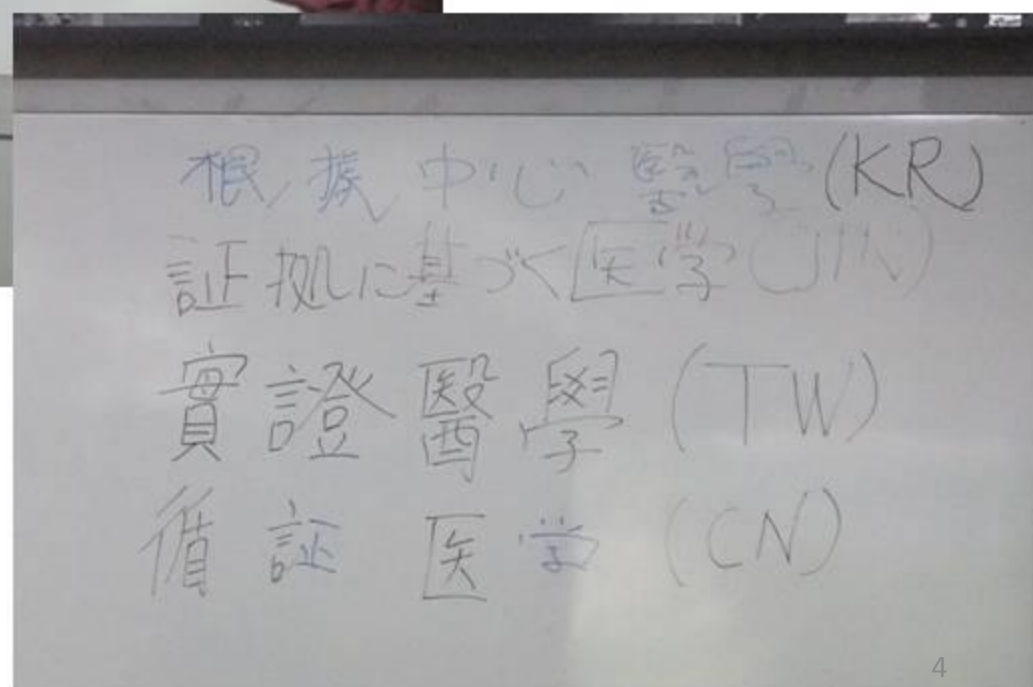

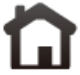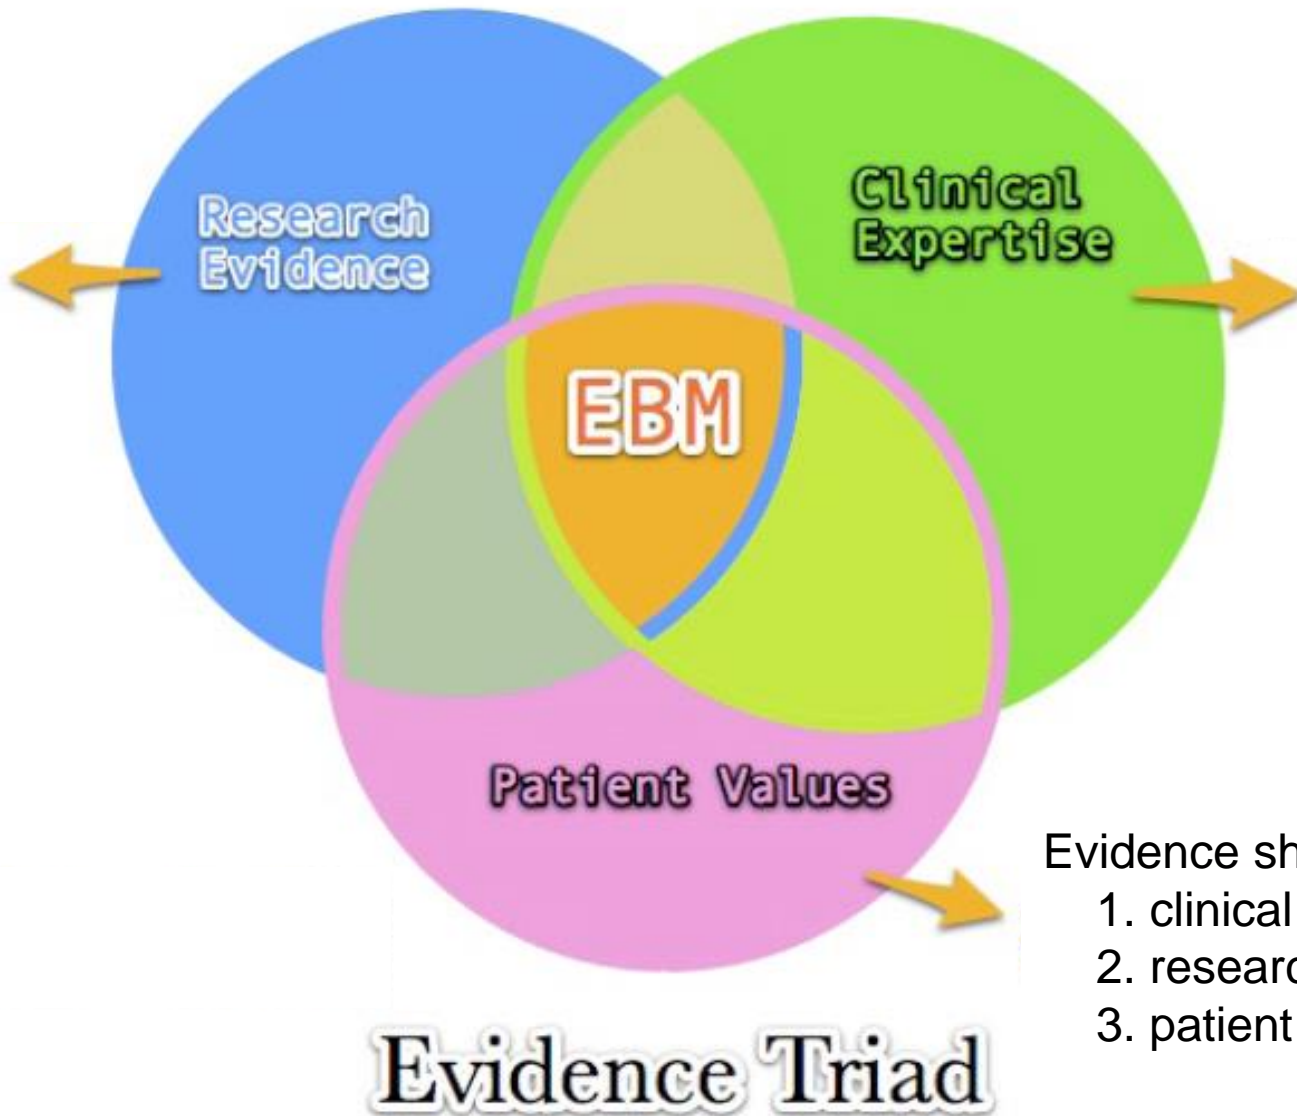

Evidence should be included

1. clinical expertise
2. research evidence
3. patient value

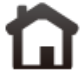

# EBM 5 steps

1. Asking: Converting the clinical uncertainties into an answerable question.
2. Accessing: Search the database and tracking down the best available evidence
3. Appraising: Critical appraising that evidence for its validity and importance
4. Applying: Integrating the critical appraising with our clinical expertise and our patient's unique biology, values and circumstances
5. Auditing: Evaluating our effectiveness and efficiency in executing step 1- 4 and seeking ways to improve them both for next time

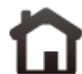

From: [http://www.hsl.unc.edu/services/tutorials/ebm\\_searching/pages/intro.htm](http://www.hsl.unc.edu/services/tutorials/ebm_searching/pages/intro.htm)

| Type of Question | Suggested best type of Study                     |
|------------------|--------------------------------------------------|
| Therapy          | RCT>cohort > case control > case series          |
| Diagnosis        | prospective, blind comparison to a gold standard |
| Etiology/Harm    | RCT > cohort > case control > case series        |
| Prognosis        | cohort study > case control > case series        |
| Prevention       | RCT>cohort study > case control > case series    |
| Clinical Exam    | prospective, blind comparison to gold standard   |
| Cost             | economic analysis                                |

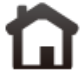

# Step 1: asking: Answerable question

## PICO

- Patient and/or Problem
- Intervention/ or Exposure
- Comparison intervention (if relevant)
- Outcomes





## Step 2: Accessing: Searching skills

- Systematic retrieval of the best evidence available
  1. Identify **terms** to fit your **PICO** question
  2. Look for **secondary** sources:
    - UpToDate, Cochrane, EBMR, DynaMed...
  3. Search for **primary** sources
    - PubMed, Medline, nursing reference, EMBASEUsing, OVIDYou...

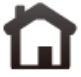

## Step 3 Appraising

- **Randomization**: the two (or more) **groups** of subjects are followed in exactly the **same way**
- the only differences in terms of **procedures, tests, outpatient visits, and follow-up calls**
- **Follow up**: **<20%** loss is better
- **Blind**: procedures that **prevent** study participants, caregivers, or outcome assessors from **knowing** which intervention was received
  - "**single**-blind," "**double**-blind," and "**triple**-blind"
  - participants, care providers, those assessing outcomes

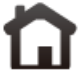

# Step 4 Applying

## Categories of recommendations

- Level A: **Good** scientific evidence suggests that the **benefits** of the clinical service substantially **outweigh** the potential risks.
- Level B: At least fair scientific evidence suggests that the **benefits** of the clinical service **outweighs** the potential risks.
- Level C: At least fair scientific evidence suggests that there are **benefits provided** by the clinical service, but the balance between benefits and risks are **too close** for making general recommendations.
- Level D: At least **fair** scientific evidence suggests that the risks of the clinical service outweighs potential benefits. Clinicians **should not** routinely offer.
- Level I: Scientific evidence is lacking, of **poor quality**, or conflicting, such that the risk versus benefit **balance cannot be assessed**.



# Step 5 auditing

1. Am I asking any clinical questions at all?
2. Am I asking well-formulated questions:
  - ✓ Two-part questions about “background” knowledge?
  - ✓ Four- (or three-) part questions about “foreground” diagnosis, management, etc.?
3. Am I using a “map” to locate my knowledge gaps and articulate questions?
4. Can I get myself “unstuck” when asking questions?
5. Do I have a working method to save my questions for later answering?



# Randomized controlled trial

- specific type of scientific experiment, and the gold standard for a clinical trial
- used to test the efficacy or effectiveness of various types of medical intervention within a patient population
- May provide an opportunity to gather useful information about adverse effects, such as drug reactions

# **Number needed to treat / harm (NNT/NNH)**

- ways of expressing the effectiveness and safety of an intervention in a way that is clinically meaningful.
- In general, compared two treatments A and B
- A typically a drug; and B a placebo
- probabilities %A and %B of treatments A and B
- $NNT = 1/(\%B - \%A)$
- example, an NNT of 4 means if 4 patients are treated, only one would respond.



# Systematic review

- A **systematic review** is a literature review
- focused on a research question that tries to **identify, appraise, select and synthesize** all high quality research evidence **relevant to that question**.
- Systematic reviews of high-quality randomized controlled trials are crucial to evidence-based medicine



# Meta-analysis

- Meta-analyses are often, but not always, important components of a systematic review procedure
- **methods** that focus on contrasting and **combining results** from different studies
- hope of identifying **patterns among study results**, sources of disagreement among those results, or other interesting relationships
- more powerfully estimate the **true effect size** as opposed to a **less precise effect size derived in a single** study
- a framework called estimation statistics which relies on effect sizes, confidence intervals and precision planning to guide data analysis, and is an alternative to null hypothesis significance testing.



Q: 5 steps of evidence based medicine?

1

2

3

4

5

apply

appraisal

ask

Assess

audit

應用證據

評讀

提問

搜尋

評估

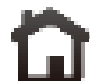

Q: Is the follow up enough ?  
How many % completed the study  
and this make the study reliable?

1. 80%
2. 70%
3. 50%

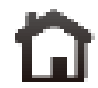

Q: Can statin reduce subarachnoid hemorrhage?

take statin 100 persons with 7 got subarachnoid hemorrhage, control with 100 persons and 17 got subarachnoid hemorrhage ( incidence of delayed ischemic deficits)

relative risk(RR)=

|      |     |     |
|------|-----|-----|
| 0.07 | 0.1 | 0.4 |
| 0.17 | 9   | 10  |

absolute risk reduction  
(ARR)=

number need to treat (NNT) =

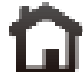

relative risk

$$RR = (7/100) / (17/100) = 0.41$$

absolute risk reduction =

$$17/100 - 7/100 = 10/100 = 0.1$$

NNT =

$$1 / (17/100 - 7/100) = 1 / 0.1 = 10$$

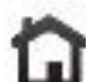

## Q: Homogeneity and heterogeneity?

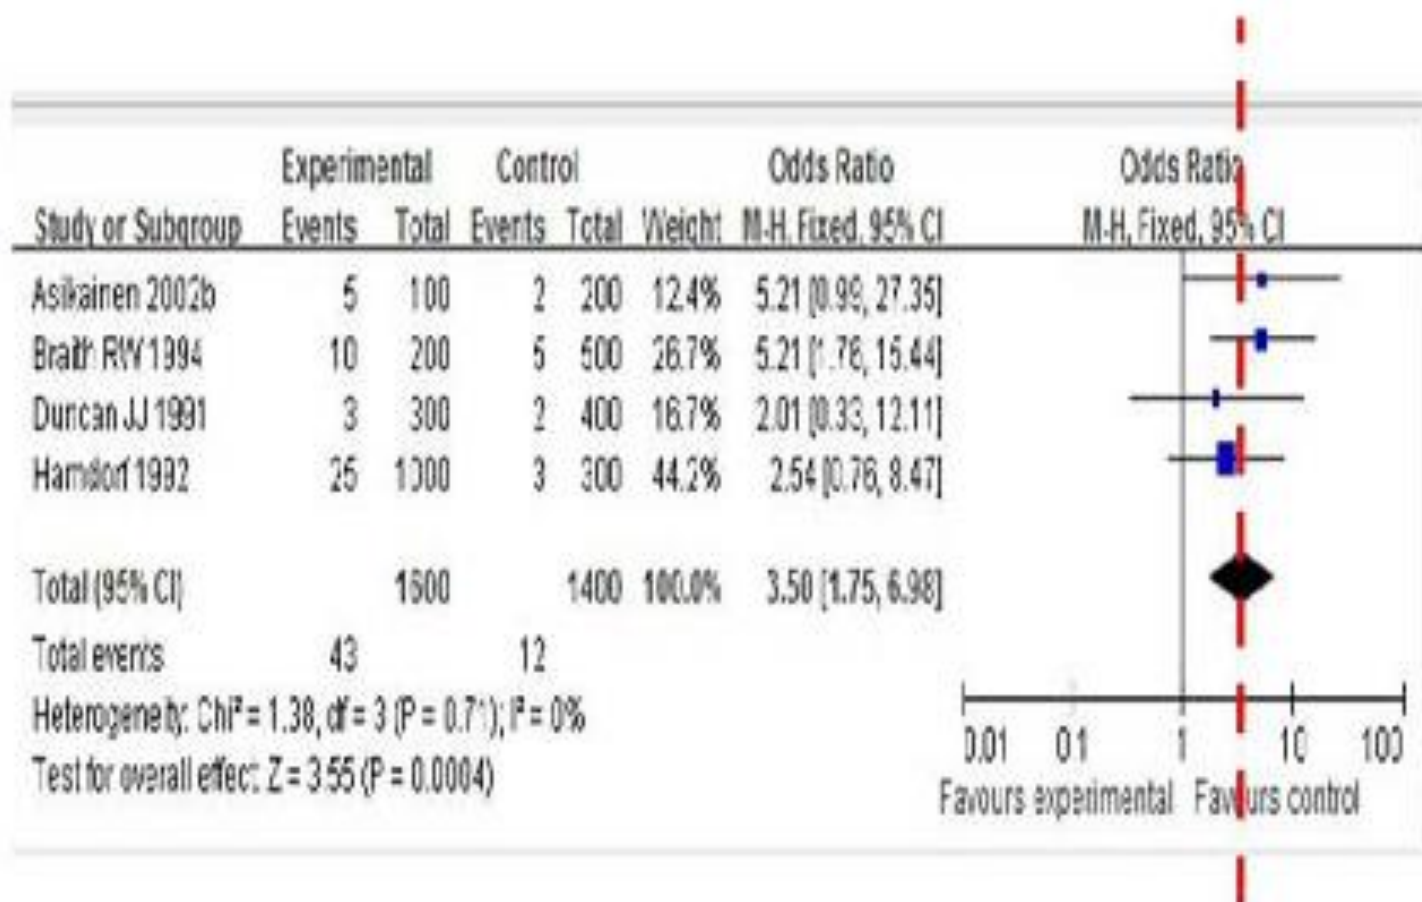

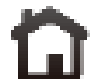

## Q:homogeneity and heterogeneity?

Heterogeneity:  $\text{Chi}^2 = 1.38$ ,  $\text{df} = 3$  ( $P = 0.71$ );  $I^2 = 0\%$

Test for overall effect:  $Z = 3.55$  ( $P = 0.0004$ )

Heterogeneity  $p =$

$Q =$

$Q/\text{df} =$

$I^2 =$

$< 0.1$     $> 0.1$

$> 0.05$     $0\%$

$< 1$     $> 1$

$1.38$     $4\%$

$3.55$

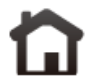

# 2001 Oxford Center for EBM: Levels of Evidence

| 建議<br>等級 | 證據<br>標準 | Therapy/Prevention/Etiology/Harm                                  |
|----------|----------|-------------------------------------------------------------------|
| A        | 1a       | 系統性回顧 <b>Systematic review</b><br>(分析數個隨機臨床對照試驗, 其結果均類似)          |
| A        | 1b       | 設計良好, 結果精確 之隨機( <b>RCT</b> )臨床對照試驗                                |
| A        | 1c       | <b>All or none</b>                                                |
| B        | 2a       | 系統性回顧( <b>SR</b> ) (分析數個世代研究, 其結果均類似)                             |
| B        | 2b       | 世代研究 <b>Cohort study</b> ; 設計粗糙之隨機臨床對照試驗<br>( <b>&lt;50%RCT</b> ) |
| B        | 2c       | <b>"Outcomes" Research; Ecological studies</b>                    |
| B        | 3a       | 系統性回顧 (分析數個病例 - 對照研究, 其結果均類似)                                     |
| B        | 3b       | 病例 - 對照研究 <b>Individual Case-control study</b>                    |
| C        | 4        | 某家醫院的十年經驗; 設計不良之世代研究 及病例 - 對照研究                                   |
| D        | 5        | 未經考證之專家個人意見, 基礎研究, 細胞實驗, 生理實驗, 動物實驗...的結果                         |

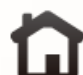

# Level of evidence

2001

Oxford Centre for Evidence-based Medicine Levels of Evidence (May 2001)

| Level | Therapy/Prevention, Aetiology/Harm                                                                               | Prognosis                                                                                                                                | Diagnosis                                                                                                                                          | Differential diagnosis/symptom prevalence study                                                                  | Economic and decision analyses                                                                                                                                    |
|-------|------------------------------------------------------------------------------------------------------------------|------------------------------------------------------------------------------------------------------------------------------------------|----------------------------------------------------------------------------------------------------------------------------------------------------|------------------------------------------------------------------------------------------------------------------|-------------------------------------------------------------------------------------------------------------------------------------------------------------------|
| 1a    | SR (with <u>homogeneity</u> <sup>*)</sup> of RCTs                                                                | SR (with <u>homogeneity</u> <sup>*)</sup> of inception cohort studies; CDR† validated in different populations                           | SR (with <u>homogeneity</u> <sup>*)</sup> of Level 1 diagnostic studies; CDR† with 1b studies from different clinical centres                      | SR (with <u>homogeneity</u> <sup>*)</sup> of prospective cohort studies                                          | SR (with <u>homogeneity</u> <sup>*)</sup> of Level 1 economic studies                                                                                             |
| 1b    | Individual RCT (with narrow <u>Confidence Interval</u> ‡)                                                        | Individual inception cohort study with ≥ 80% follow-up; CDR† validated in a single population                                            | Validating <sup>*)</sup> cohort study with good††† reference standards; or CDR† tested within one clinical centre                                  | Prospective cohort study with good follow-up <sup>****</sup>                                                     | Analysis based on clinically sensible costs or alternatives; systematic review(s) of the evidence; and including multi-way sensitivity analyses                   |
| 1c    | <u>All or none</u> §                                                                                             | All or none case-series                                                                                                                  | Absolute SpPins and SnNouts††                                                                                                                      | All or none case-series                                                                                          | Absolute better-value or worse-value analyses ††††                                                                                                                |
| 2a    | SR (with <u>homogeneity</u> <sup>*)</sup> of cohort studies                                                      | SR (with <u>homogeneity</u> <sup>*)</sup> of either retrospective cohort studies or untreated control groups in RCTs                     | SR (with <u>homogeneity</u> <sup>*)</sup> of Level >2 diagnostic studies                                                                           | SR (with <u>homogeneity</u> <sup>*)</sup> of 2b and better studies                                               | SR (with <u>homogeneity</u> <sup>*)</sup> of Level >2 economic studies                                                                                            |
| 2b    | Individual cohort study (including low quality RCT; e.g., <80% follow-up)                                        | Retrospective cohort study or follow-up of untreated control patients in an RCT; Derivation of CDR† or validated on split-sample§§§ only | Exploratory <sup>***</sup> cohort study with good††† reference standards; CDR† after derivation, or validated only on split-sample§§§ or databases | Retrospective cohort study, or poor follow-up                                                                    | Analysis based on clinically sensible costs or alternatives; limited review(s) of the evidence, or single studies; and including multi-way sensitivity analyses   |
| 2c    | "Outcomes" Research; Ecological studies                                                                          | "Outcomes" Research                                                                                                                      |                                                                                                                                                    | Ecological studies                                                                                               | Audit or outcomes research                                                                                                                                        |
| 3a    | SR (with <u>homogeneity</u> <sup>*)</sup> of case-control studies                                                |                                                                                                                                          | SR (with <u>homogeneity</u> <sup>*)</sup> of 3b and better studies                                                                                 | SR (with <u>homogeneity</u> <sup>*)</sup> of 3b and better studies                                               | SR (with <u>homogeneity</u> <sup>*)</sup> of 3b and better studies                                                                                                |
| 3b    | Individual Case-Control Study                                                                                    |                                                                                                                                          | Non-consecutive study; or without consistently applied reference standards                                                                         | Non-consecutive cohort study, or very limited population                                                         | Analysis based on limited alternatives or costs, poor quality estimates of data, but including sensitivity analyses incorporating clinically sensible variations. |
| 4     | Case-series (and <u>poor quality cohort and case-control studies</u> §§)                                         | Case-series (and <u>poor quality prognostic cohort studies</u> <sup>***</sup> )                                                          | Case-control study, poor or non-independent reference standard                                                                                     | Case-series or superseded reference standards                                                                    | Analysis with no sensitivity analysis                                                                                                                             |
| 5     | Expert opinion without explicit critical appraisal, or based on physiology, bench research or "first principles" | Expert opinion without explicit critical appraisal, or based on physiology, bench research or "first principles"                         | Expert opinion without explicit critical appraisal, or based on physiology, bench research or "first principles"                                   | Expert opinion without explicit critical appraisal, or based on physiology, bench research or "first principles" | Expert opinion without explicit critical appraisal, or based on economic theory or "first principles"                                                             |



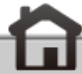

| Question                                                              | Step 1<br>(Level 1*)                                                                                                                                                                                            | Step 2<br>(Level 2*)                                                                         | Step 3<br>(Level 3*)                                                                                                                                                                                                  | Step 4<br>(Level 4*)                                                           | Step 5 (Level 5)          |
|-----------------------------------------------------------------------|-----------------------------------------------------------------------------------------------------------------------------------------------------------------------------------------------------------------|----------------------------------------------------------------------------------------------|-----------------------------------------------------------------------------------------------------------------------------------------------------------------------------------------------------------------------|--------------------------------------------------------------------------------|---------------------------|
| <b>How common is the problem?</b><br><b>common</b>                    | Local and current random sample surveys (or censuses)                                                                                                                                                           | Systematic review of surveys that allow matching to local circumstances**                    | Local non-random sample**                                                                                                                                                                                             | Case-series**                                                                  | n/a                       |
| <b>Is this diagnostic or monitoring test accurate?</b><br>(Diagnosis) | Systematic review of cross sectional studies with consistently applied reference standard and blinding                                                                                                          | Individual cross sectional studies with consistently applied reference standard and blinding | Non-consecutive studies, or studies without consistently applied reference standards**                                                                                                                                | Case-control studies, or "poor or non-independent reference standard**         | Mechanism-based reasoning |
| <b>What will happen if we do not add a therapy?</b><br>(Prognosis)    | Systematic review of inception cohort studies                                                                                                                                                                   | Inception cohort studies                                                                     | Cohort study or control arm of randomized trial*                                                                                                                                                                      | Case-series or case-control studies, or poor quality prognostic cohort study** | n/a                       |
| <b>Does this intervention help?</b><br>(Treatment Benefits)           | Systematic review of randomized trials or <i>n</i> -of-1 trials                                                                                                                                                 | Randomized trial or observational study with dramatic effect                                 | Non-randomized controlled cohort/follow-up study**                                                                                                                                                                    | Case-series, case-control studies, or historically controlled studies**        | Mechanism-based reasoning |
| <b>What are the COMMON harms?</b><br>(Treatment Harms)                | Systematic review of randomized trials, systematic review of nested case-control studies, <i>n</i> -of-1 trial with the patient you are raising the question about, or observational study with dramatic effect | Individual randomized trial or (exceptionally) observational study with dramatic effect      | Non-randomized controlled cohort/follow-up study (post-marketing surveillance) provided there are sufficient numbers to rule out a common harm. (For long-term harms the duration of follow-up must be sufficient.)** | Case-series, case-control, or historically controlled studies**                | Mechanism-based reasoning |
| <b>What are the RARE harms?</b><br>(Treatment Harms)                  | Systematic review of randomized trials or <i>n</i> -of-1 trial                                                                                                                                                  | Randomized trial or (exceptionally) observational study with dramatic effect                 |                                                                                                                                                                                                                       |                                                                                |                           |
| <b>Is this (early detection) test worthwhile?</b><br>(Screening)      | Systematic review of randomized trials                                                                                                                                                                          | Randomized trial                                                                             | Non-randomized controlled cohort/follow-up study**                                                                                                                                                                    | Case-series, case-control, or historically controlled studies**                | Mechanism-based reasoning |

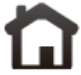

# Impact of quality of **evidence** on strength of **recommendation**

GRADE system

(Grading of Recommendations  
Assessment, Development and  
Evaluation)

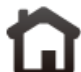

#### 4. Write the recommendation and determine the strength (strong or weak/conditional)

Determine whether the recommendation is “for” or “against” an intervention.

- If benefits outweigh downsides, guideline panels will recommend “for” an intervention.
- If downsides outweigh benefits, guideline panels will recommend “against” an intervention.

Determine the wording of recommendation. There are 3 wording options.

|                               | Wording 1           | Wording 2                | Wording 3                        |
|-------------------------------|---------------------|--------------------------|----------------------------------|
| Strong recommendation for     | We recommend...     | Clinicians should...     | We recommend...                  |
| Weak recommendation for       | We suggest          | Clinicians might...      | We conditionally recommend...    |
| Weak recommendation against   | We suggest...not    | Clinicians might not...  | We conditionally recommend...not |
| Strong recommendation against | We recommend ...not | Clinicians should not... | We recommend ...not              |

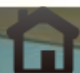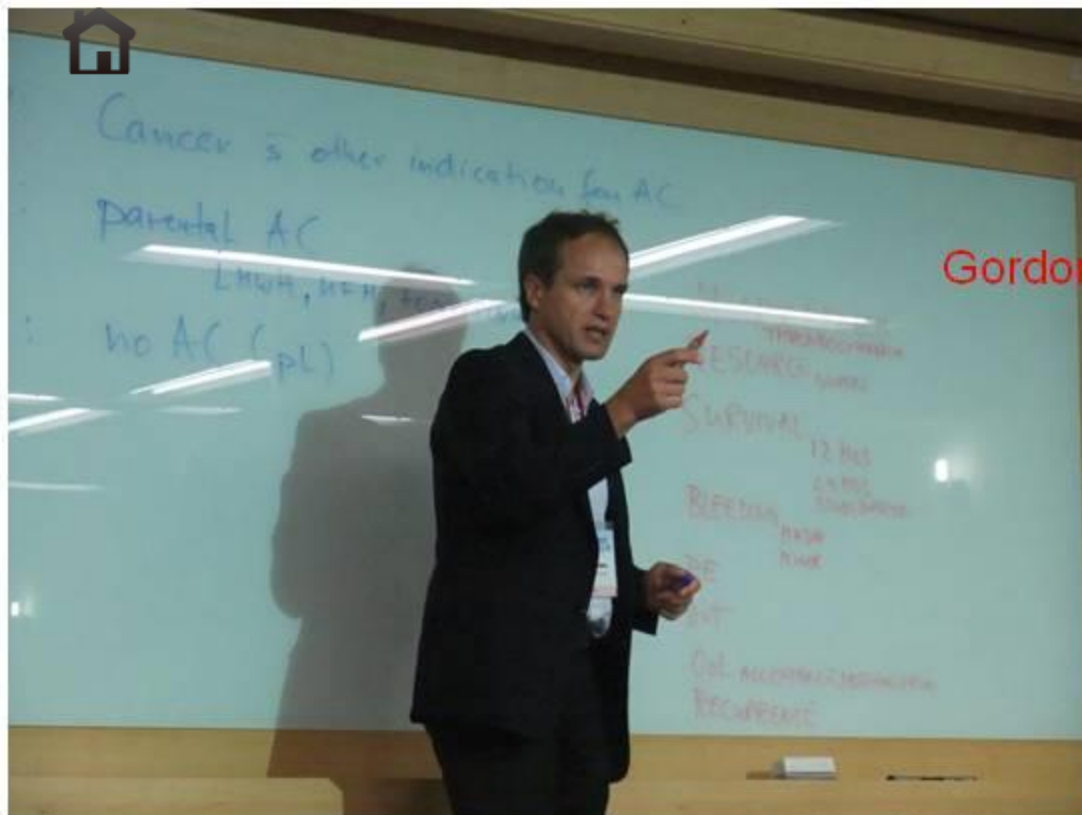

Gordon Guyatt

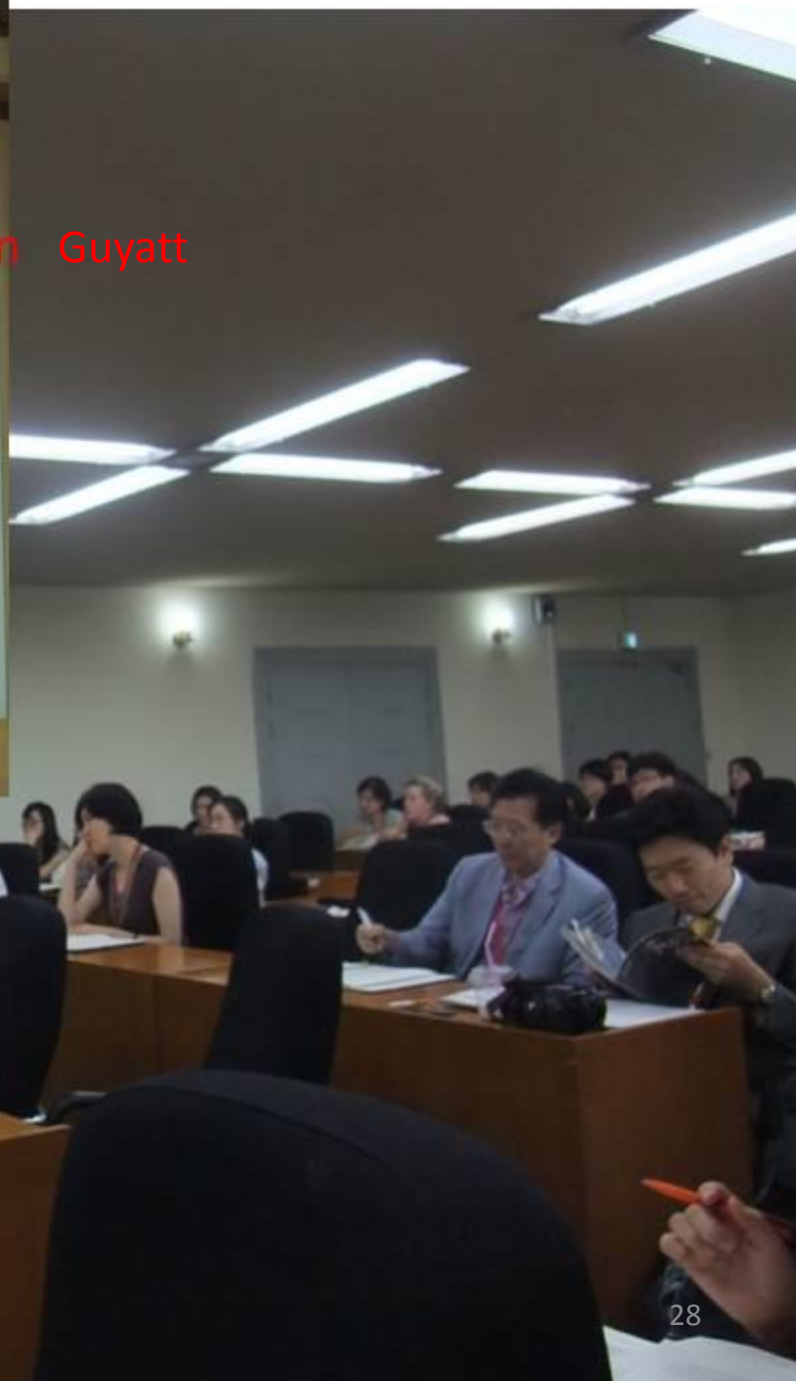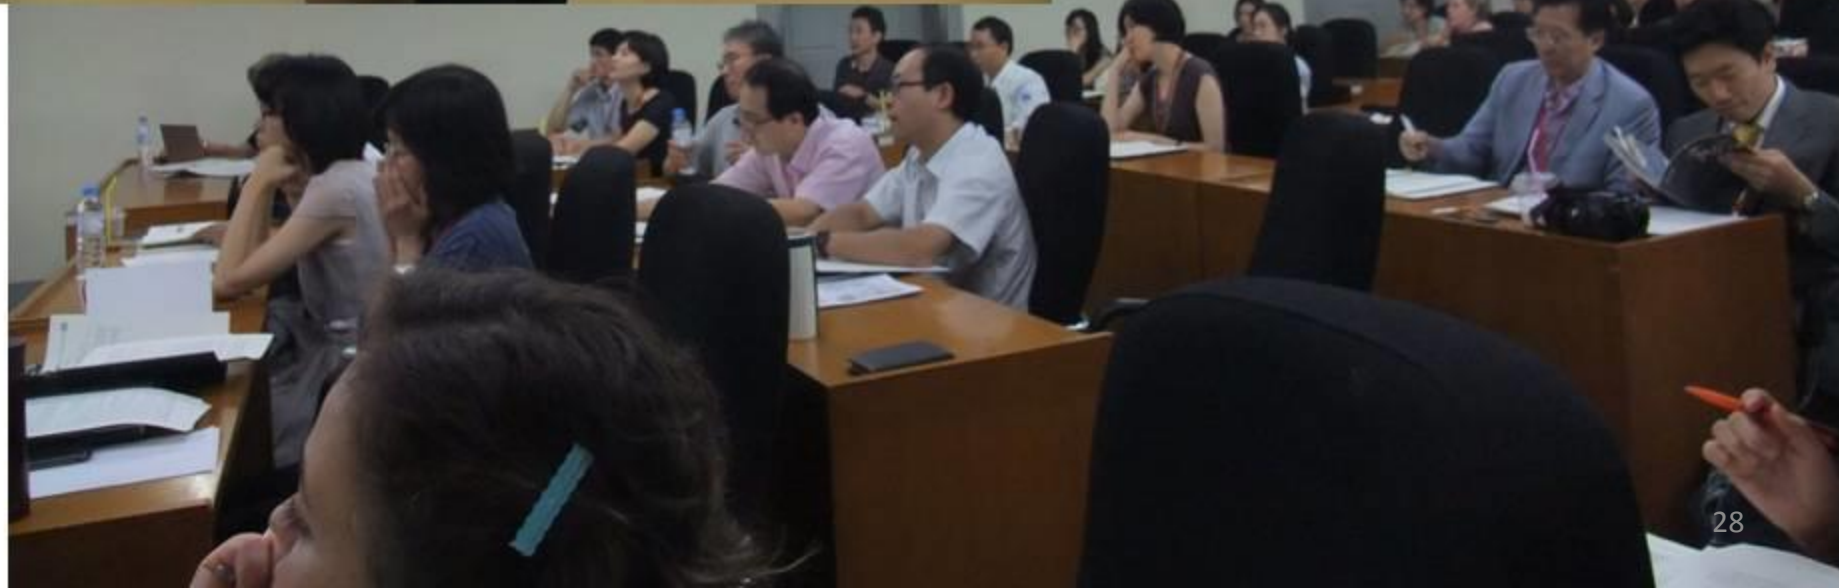



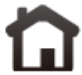

## 1. Quality of evidence

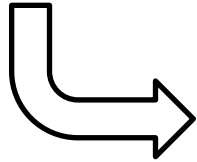

### 1. Limitations of design

– **bias**

### 2. Inconsistency

– Larger dose for sicker

### 3. Indirectness

– Different PIC to the (O)outcome

### 4. Imprecision

– Sample size, 95%CI

### 5. Publication bias

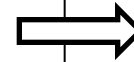

### 1. Allocation concealment

### 2. Blinding

### 3. Loss of follow – up

### 4. Intention to treat

### 5. Stop early

### 6. Neglect to report outcomes

## 2. Balance of benefits vs harms & burdens

## 3. Values and preferences

## 4. Resource implications

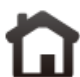

# GRADE guidelines: Four domains

## 一. Quality of evidence

- Key reasons for **downgrading** or **upgrading**
- Whether data for outcome is not available?

## 二. Balance of benefits versus harms and burdens

- Baseline risks for benefit or harms
- Modeling require?

## 三. Values and preferences

- Perspective 均衡 taken and source
- **Methods** determine values satisfactory?

## 四. Resource implications

- **Cost** per unit, feasibility, opportunity costs, settings
